# Supplementary material for: An economical synthesis of benzodiazepines using ACT@IRMOF core–shell as a potential eco-friendly catalyst through the activated carbon of thymus plant (ACT)
Source: Royal Society of Chemistry journal article supplement (doi:10.1039/d4na00907j), 2024-12-18

**An economical synthesis of benzodiazepine derivatives using activated carbon of Thymus plant (ACT) modified IRMOF-3 core-shell as a potential ecofriendly catalyst**

Maryam Fereydooni,<sup>a</sup> Ramin Ghorbani-Vaghei\*,<sup>a,b</sup> Sedigheh Alavinia<sup>a</sup>

*<sup>a</sup>Department of Organic Chemistry, Faculty of Chemistry and Petroleum Sciences, Bu-Ali Sina University, 6517838683, Hamadan, Iran. E-mail: [rgvaghei@yahoo.com](mailto:rgvaghei@yahoo.com); [ghorbani@basu.ac.ir](mailto:ghorbani@basu.ac.ir)*

*<sup>b</sup>Department of Organic Chemistry, Faculty of Chemistry, University of Guilan, Rasht, Iran*

### **Sample characterization**

The samples were pressed using the KBr pellet method and analyzed at a constant temperature of 20°C, a humidity of 35%, and a scanning range of 400-4000 cm<sup>-1</sup> using a Perkin-Elmer Spectrum infrared spectrometer. Field emission scanning electron microscopy was applied to examine the surface morphology of ACT and ACT@IRMOF-3 (with an accelerating voltage of around 20 KV FE-SEM QUANTA FEG250, Republic of Czech). Transmission electron microscopy (TEM; JEOL, JEM 2100, 120 KV acceleration voltages, Japan) was applied to analyze the particle size. <sup>1</sup>H NMR and <sup>13</sup>C NMR were measured in DMSO-d<sub>6</sub> using TMS as an internal standard on a Bruker 250 MHz spectrometer. The thermal stability of ACT and ACT@IRMOF-3 samples was investigated using a Perkin Elmer TGA/DTA instrument at a temperature of 25-600 °C. Specific surface areas of catalysts were measured by N<sub>2</sub> physisorption at liquid nitrogen temperature using a Micromeritics Tristar 3000 surface area analyzer and the standard multipoint BET analysis method. Samples were degassed in flowing N<sub>2</sub> for 12 h at 200 °C before N<sub>2</sub> physisorption measurements. The specific surface areas were evaluated using the Brunauer-Emmett-Teller (BET) method in the p/p<sub>0</sub> range of 0.05 - 0.2.

$^1\text{H}$  NMR (250 MHz, DMSO)  $\delta$  1.03 (s, 3H,  $\text{CH}_3$ ), 1.07 (s, 3H,  $\text{CH}_3$ ), 2.02 (q,  $J = 15.0$  Hz, 2H,  $-\text{CH}_2$ ), 2.55 (s, 2H,  $-\text{CH}_2-\text{C}=\text{O}$ ), 2.74 (s,  $(\text{CH}_3)_2\text{N}$ ), 5.60 (s, 1H, C-H), 6.01 (s, NH), 6.44-6.90 (m, 8H Ar), 8.64 (s, NH).  $^{13}\text{C}$  NMR (63 MHz, DMSO)  $\delta$  27.8, 28.8, 32.2, 44.6, 50.0, 55.6, 111.5, 112.3, 119.6, 120.3, 120.9, 122.9, 128.3, 131.5, 133.0, 139.3, 149.0, 154.8, 192.3.

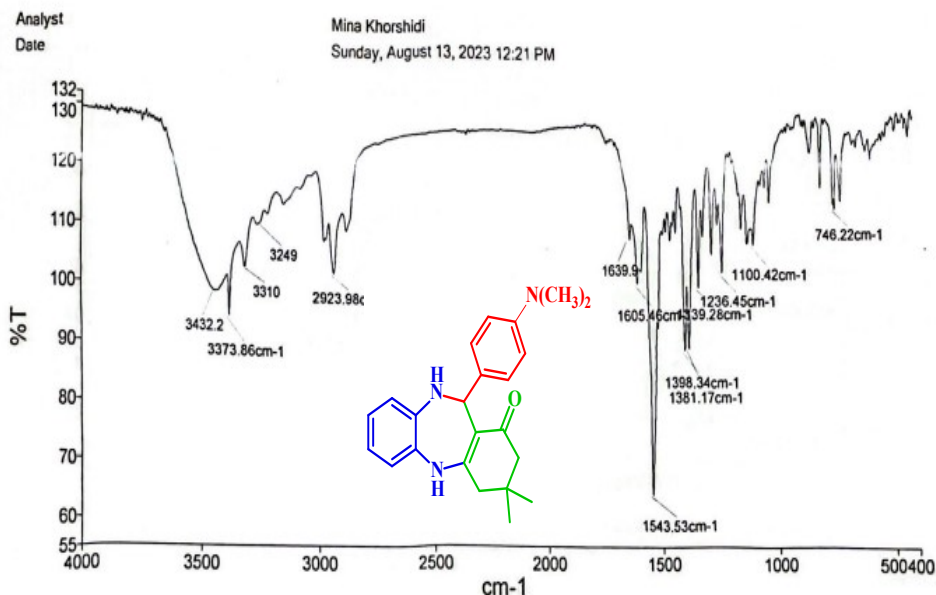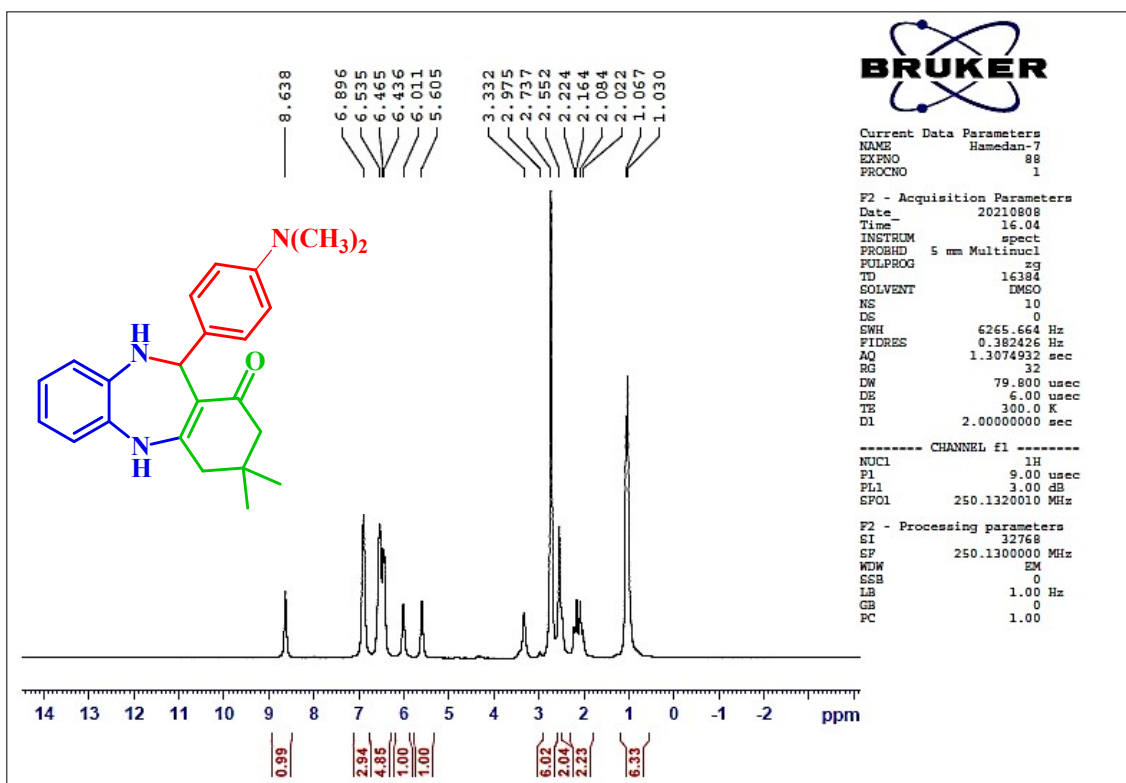

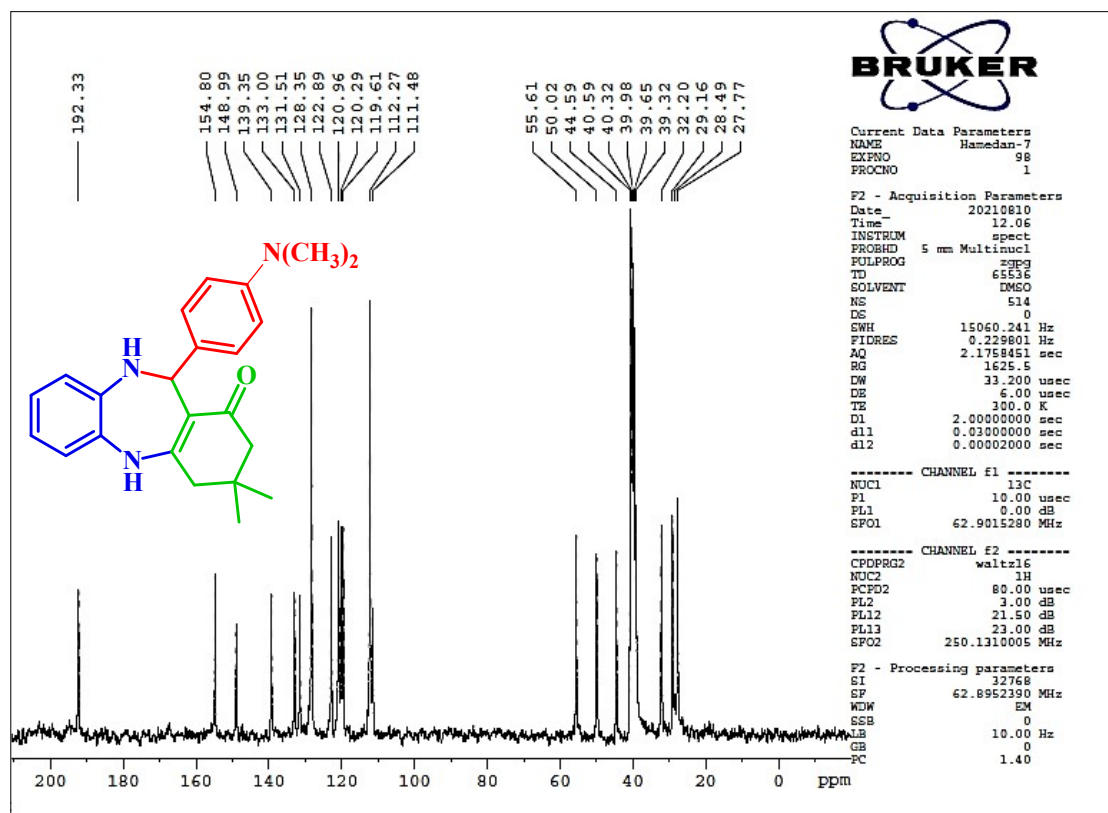

$^1\text{H}$  NMR (250 MHz, DMSO)  $\delta$  1.00 (s, 3H, CH<sub>3</sub>), 1.07 (s, 3H, CH<sub>3</sub>), 2.10 (q,  $J$  = 16.2 Hz, 2H, -CH<sub>2</sub>), 2.62 (s, 2H, -CH<sub>2</sub>-C=O), 5.62 (s, 1H, C-H), 5.94 (s, 1H Ar), 6.48-7.02 (m, 6H Ar), 7.46 (s, NH), 8.97 (s, NH).  $^{13}\text{C}$  NMR (63 MHz, DMSO)  $\delta$  28.3, 32.2, 44.5, 49.8, 54.6, 109.1, 120.6, 121.3, 123.6, 126.8, 129.1, 132.0, 132.2, 134.6, 137.7, 140.6, 156.0, 192.5.

Analyst  
Date

Mina Khorshidi  
Monday, August 19, 2024 10:18 PM

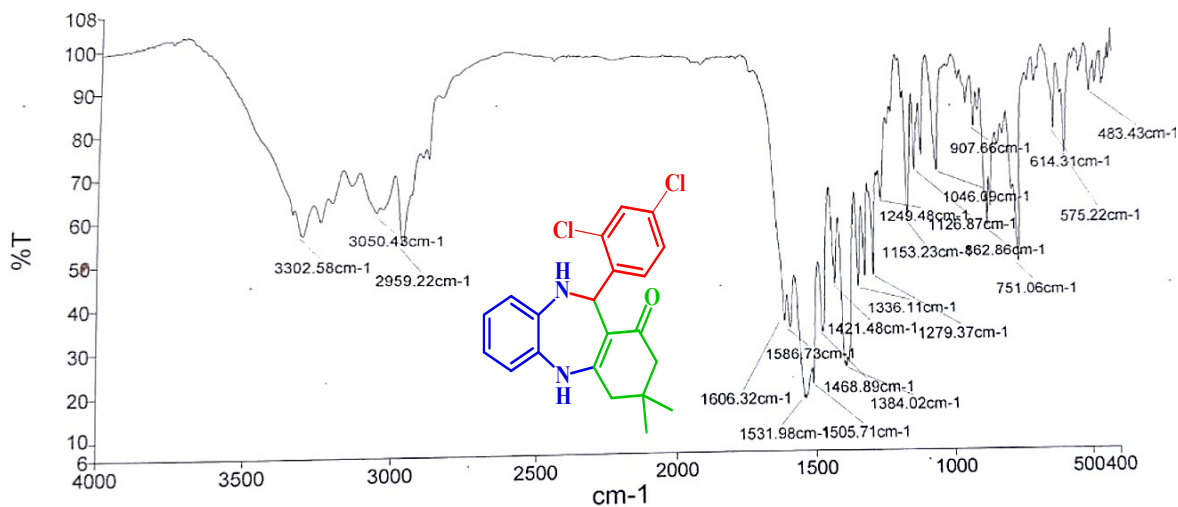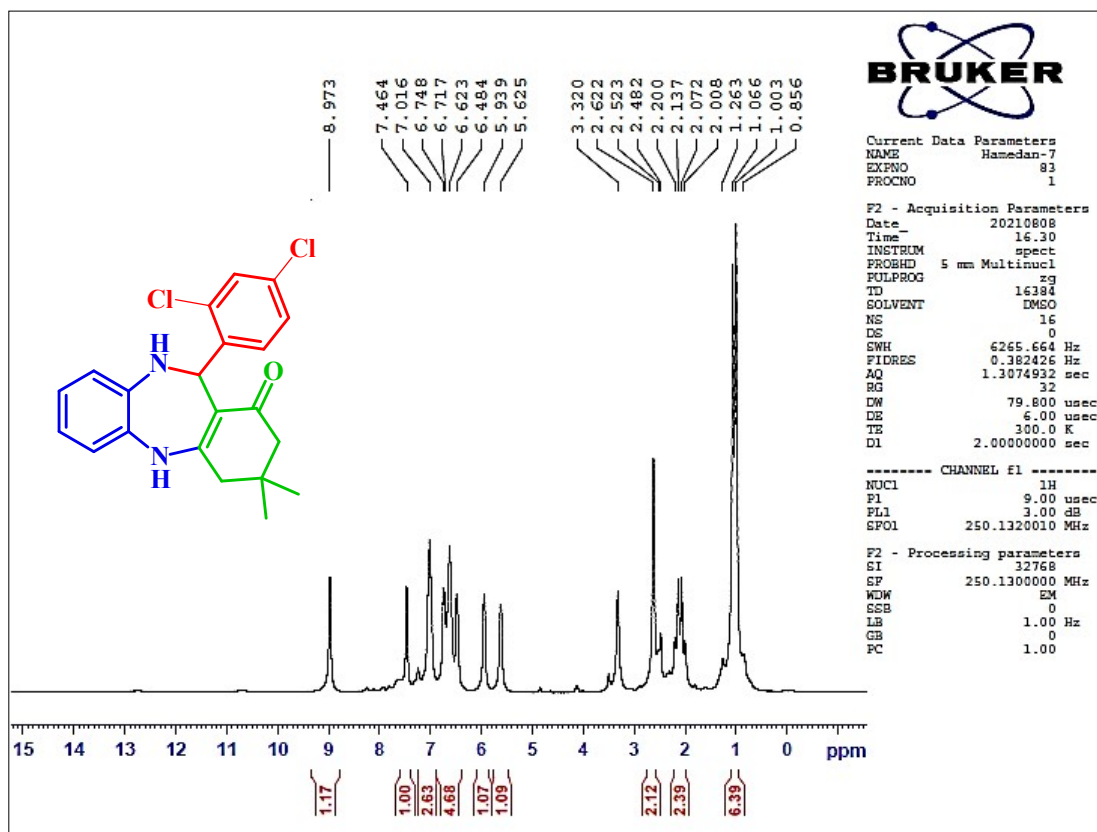

$^1\text{H}$  NMR (250 MHz, DMSO)  $\delta$  1.01 (s, 3H, CH<sub>3</sub>),  $\delta$  1.07 (s, 3H, CH<sub>3</sub>), 2.14 (q,  $J$  = 13.2 Hz, 2H, -CH<sub>2</sub>), 2.54 (d,  $J$  = 9.2 Hz, 2H, -CH<sub>2</sub>-C=O), 5.76 (s, 1H, C-H), 6.31 (s, 1H), 6.56 (s, 2H), 6.95 (s, 1H), 7.30 (d,  $J$  = 7.7 Hz, 2H), 7.99 (d,  $J$  = 7.7 Hz, 2H), 8.41 (s, NH), 8.89 (s, NH).

$^{13}\text{C}$  NMR (63 MHz, DMSO)  $\delta$  28.4, 32.2, 44.5, 49.8, 56.4, 109.4, 112.3, 120.7, 123.5, 124.8, 127.9, 128.8, 131.5, 138.3, 146.2, 153.3, 155.5, 192.7.

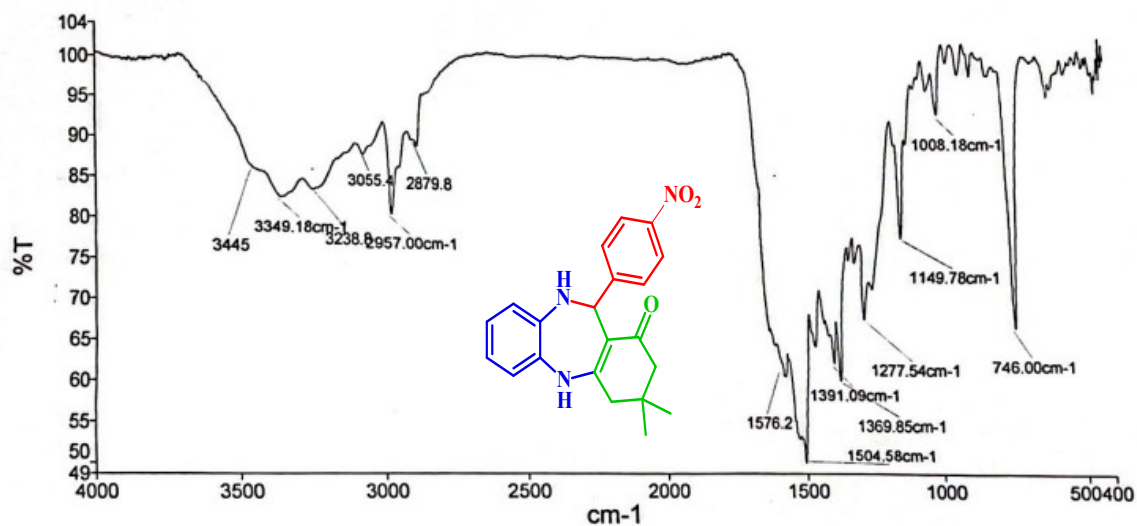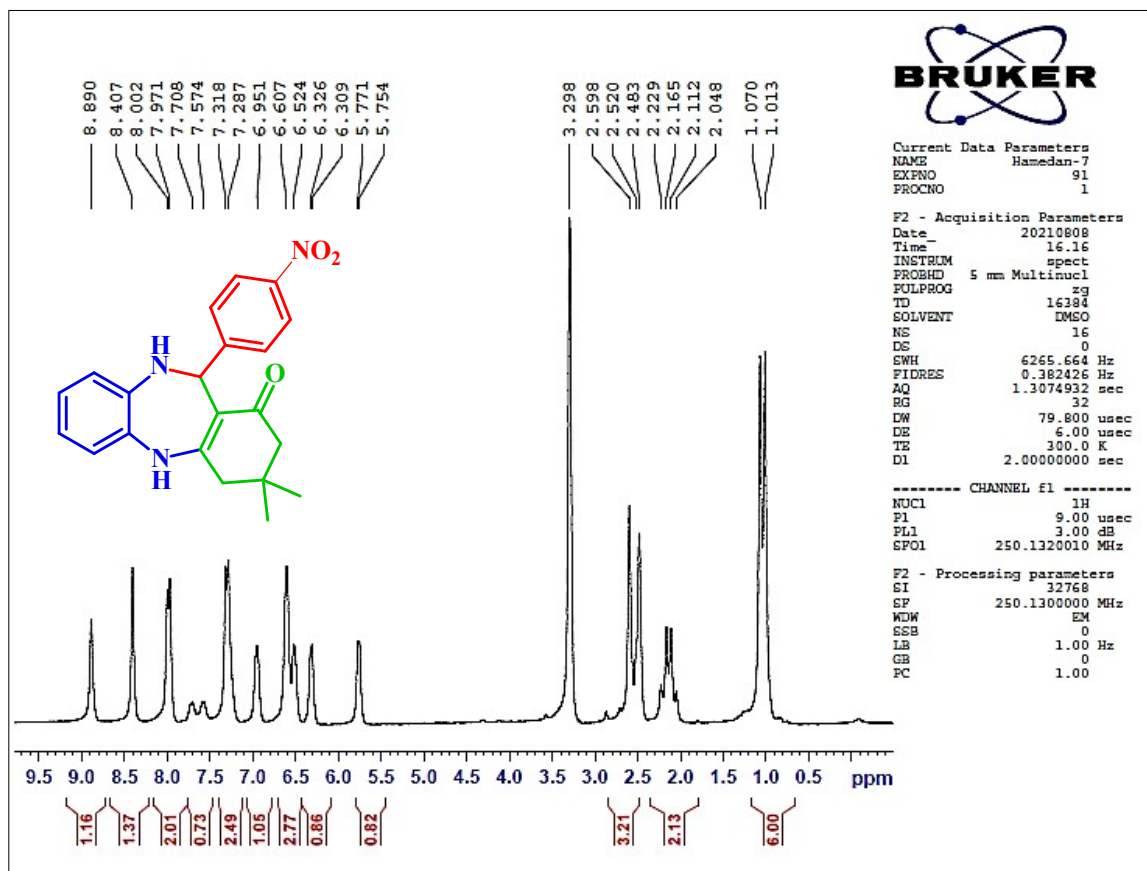

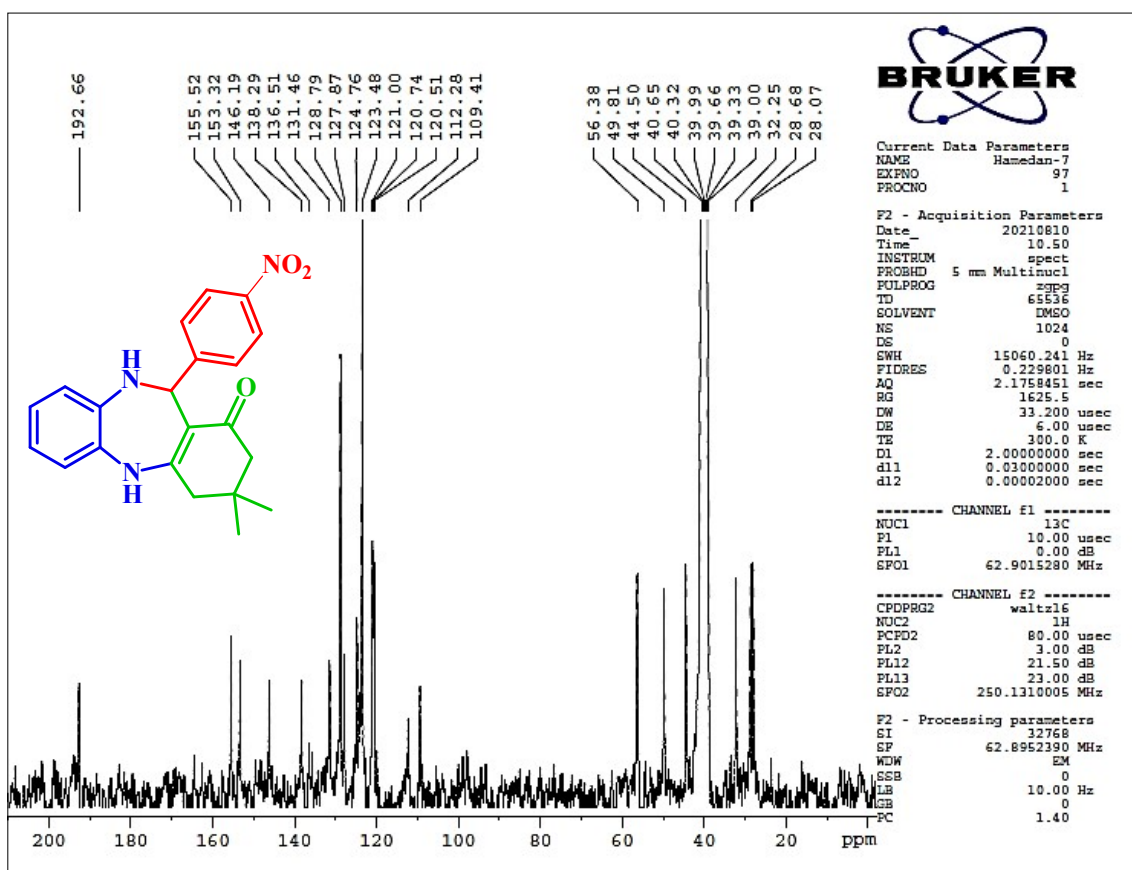

$^1\text{H}$  NMR (250 MHz, DMSO)  $\delta$  1.06 (s, 6H, 2CH<sub>3</sub>), 1.96 (s, 3H, CH<sub>3</sub>), 2.11 (s, 2H, -CH<sub>2</sub>), 2.54 (s, 2H, -CH<sub>2</sub>-C=O), 3.88 (s, OCH<sub>3</sub>), 5.26 (s, 1H), 5.91-6.88 (m, 8H Ar), 7.00 (s, NH), 8.72 (s, NH).  $^{13}\text{C}$  NMR (63 MHz, DMSO)  $\delta$  20.6, 28.5, 32.2, 44.6, 50.0, 52.7, 55.9, 109.3, 110.9, 119.8, 120.3, 120.9, 123.8, 126.9, 128.1, 129.1, 131.8, 136.3, 138.7, 155.8, 157.5, 192.2.



Analyst  
Date

Mina Khorshidi  
Tuesday, June 06, 2023 11:43 AM

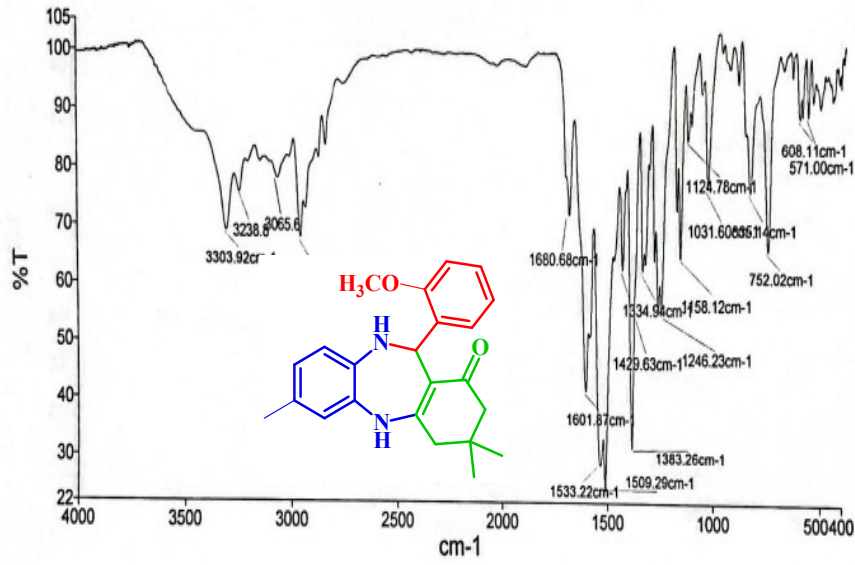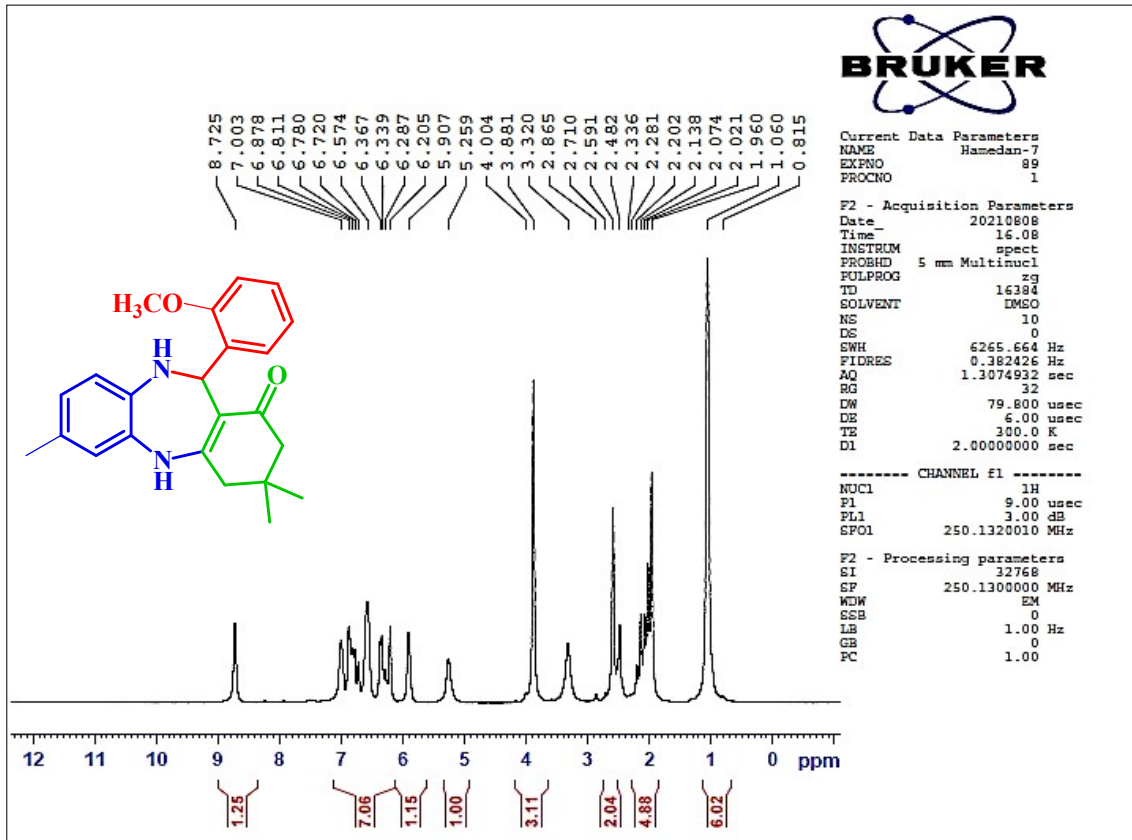



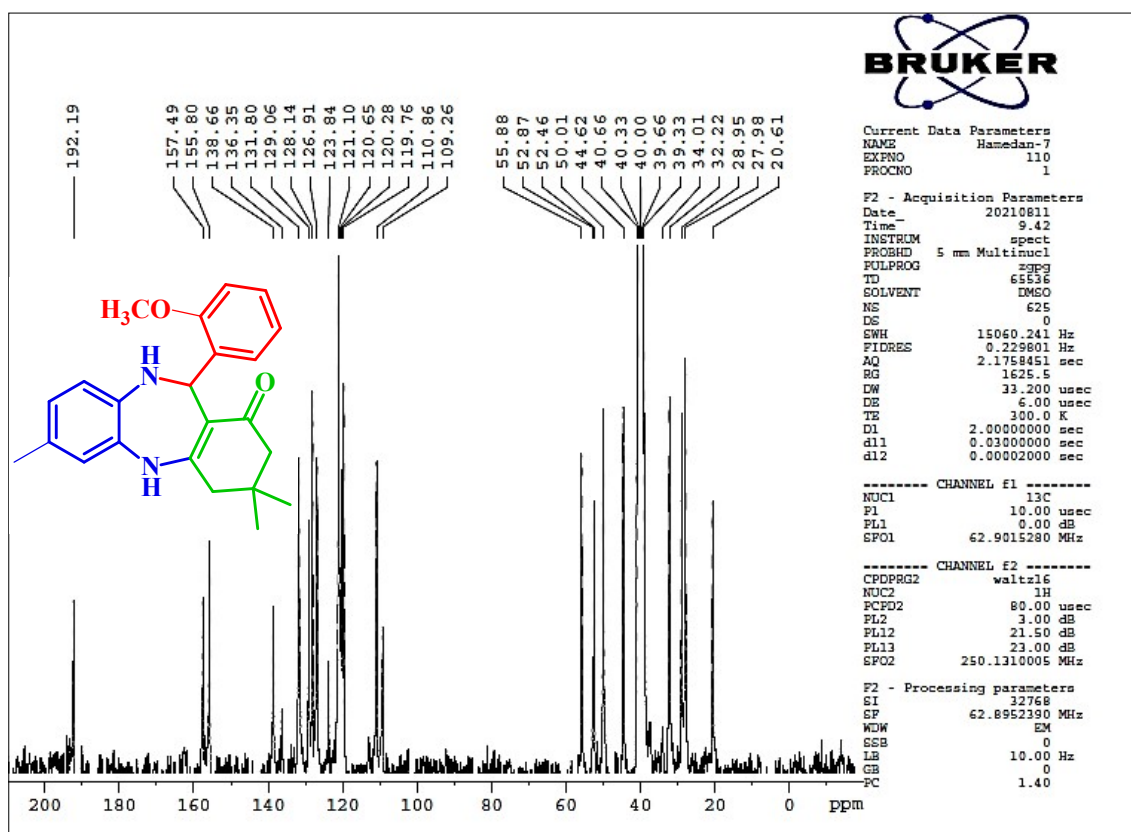

$^1\text{H}$  NMR (250 MHz, DMSO)  $\delta$  1.02 (s, 3H,  $\text{CH}_3$ ), 1.06 (s, 3H,  $\text{CH}_3$ ), 2.03 (s, 3H,  $\text{CH}_3$ ), 2.18 (s, 2H,  $-\text{CH}_2$ ), 2.53 (s, 2H,  $-\text{CH}_2-\text{C}=\text{O}$ ), 2.74 (s,  $(\text{CH}_3)_2\text{N}$ ), 5.59 (s, 1H, C-H), 5.87-6.81 (m, 7H Ar), 6.91 (s, NH), 8.60 (s, NH).  $^{13}\text{C}$  NMR (63 MHz, DMSO)  $\delta$  20.7, 27.7, 29.2, 32.2, 44.6, 50.0, 55.5, 111.2, 111.9, 120.7, 123.7, 128.4, 129.0, 131.6, 133.1, 136.9, 139.1, 149.0, 154.7, 192.1.

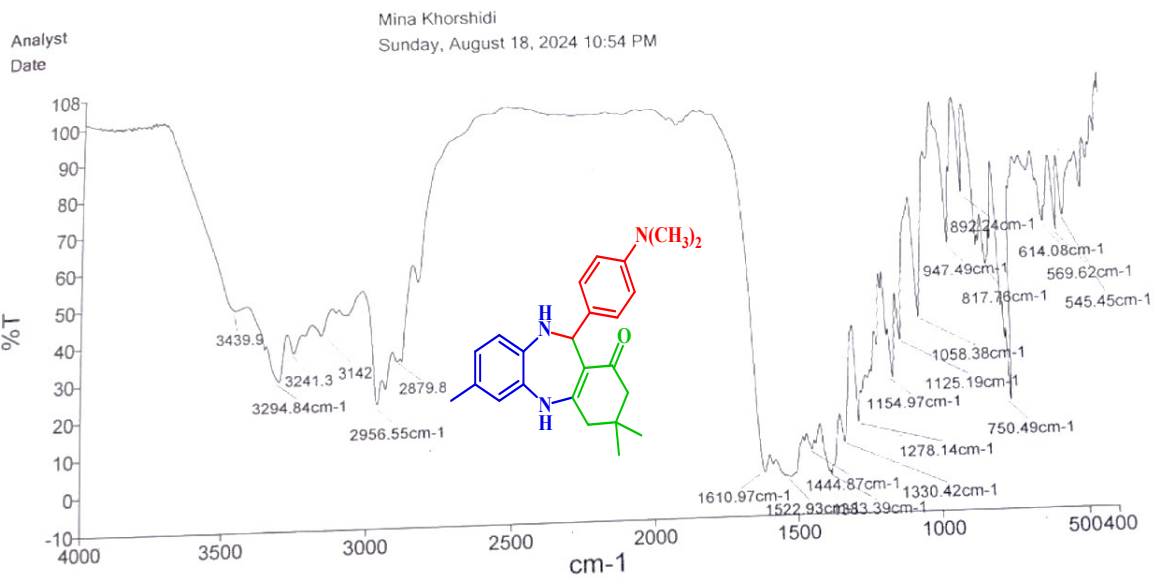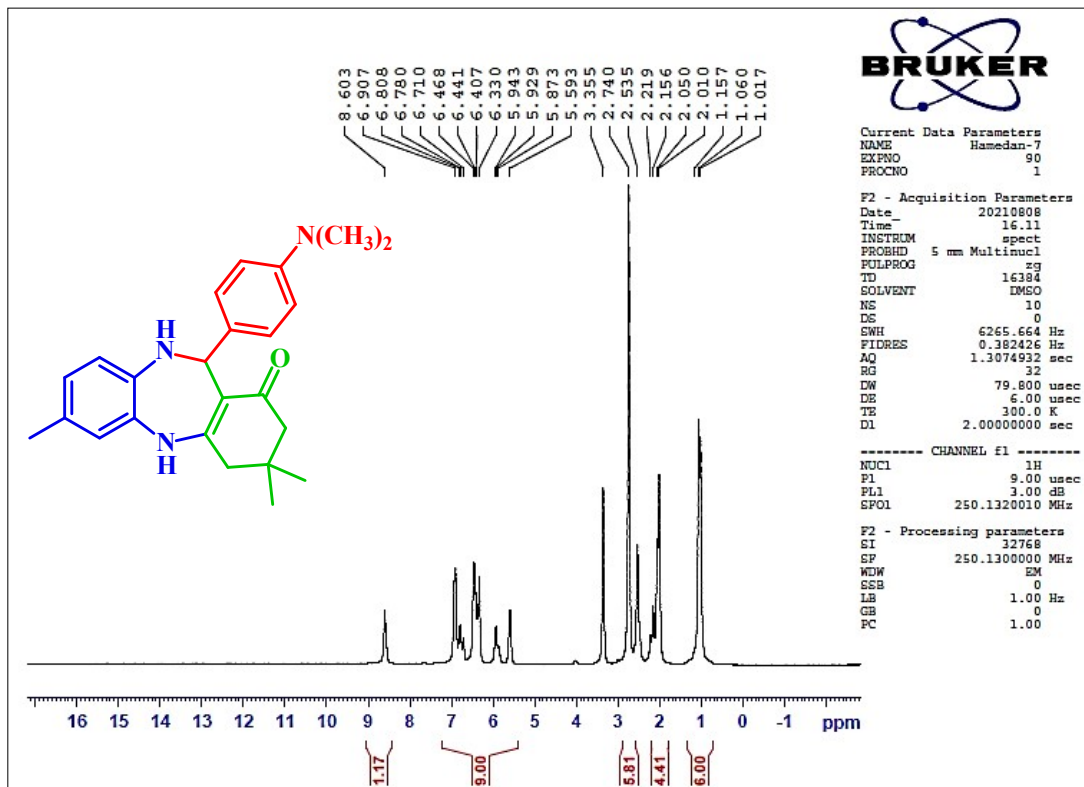

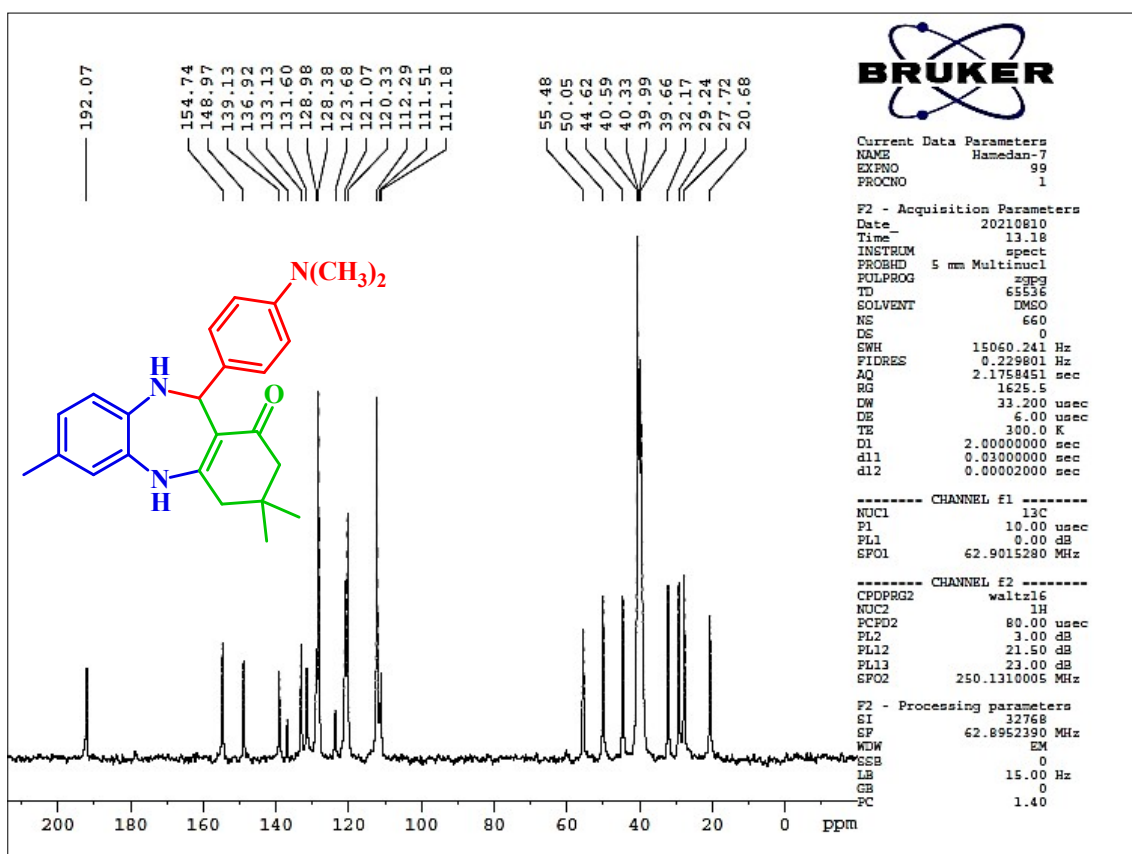

$^1\text{H}$  NMR (250 MHz, DMSO)  $\delta$  0.99 (s, 3H, CH<sub>3</sub>), 1.05 (s, 3H, CH<sub>3</sub>), 2.04 (s, 3H, CH<sub>3</sub>), 2.48 (s, 2H, -CH<sub>2</sub>), 2.54 (s, 2H, -CH<sub>2</sub>-C=O), 5.64 (s, 1H, CH), 6.08-7.08 (m, 7H Ar), 7.14 (s, NH), 8.75 (s, NH).  $^{13}\text{C}$  NMR (63 MHz, DMSO)  $\delta$  20.6, 28.4, 32.2, 44.5, 49.9, 55.7, 109.8, 120.8, 124.0, 128.1, 129.0, 129.5, 130.8, 132.1, 136.3, 138.5, 144.3, 155.3, 192.3.

Analyst  
Date

Mina Khorshidi  
Sunday, August 18, 2024 10:51 PM

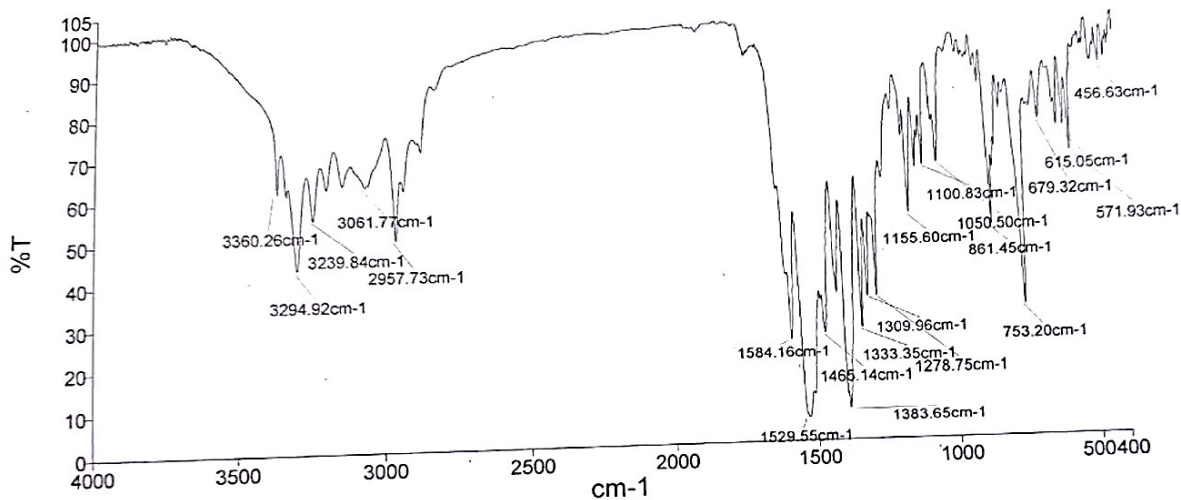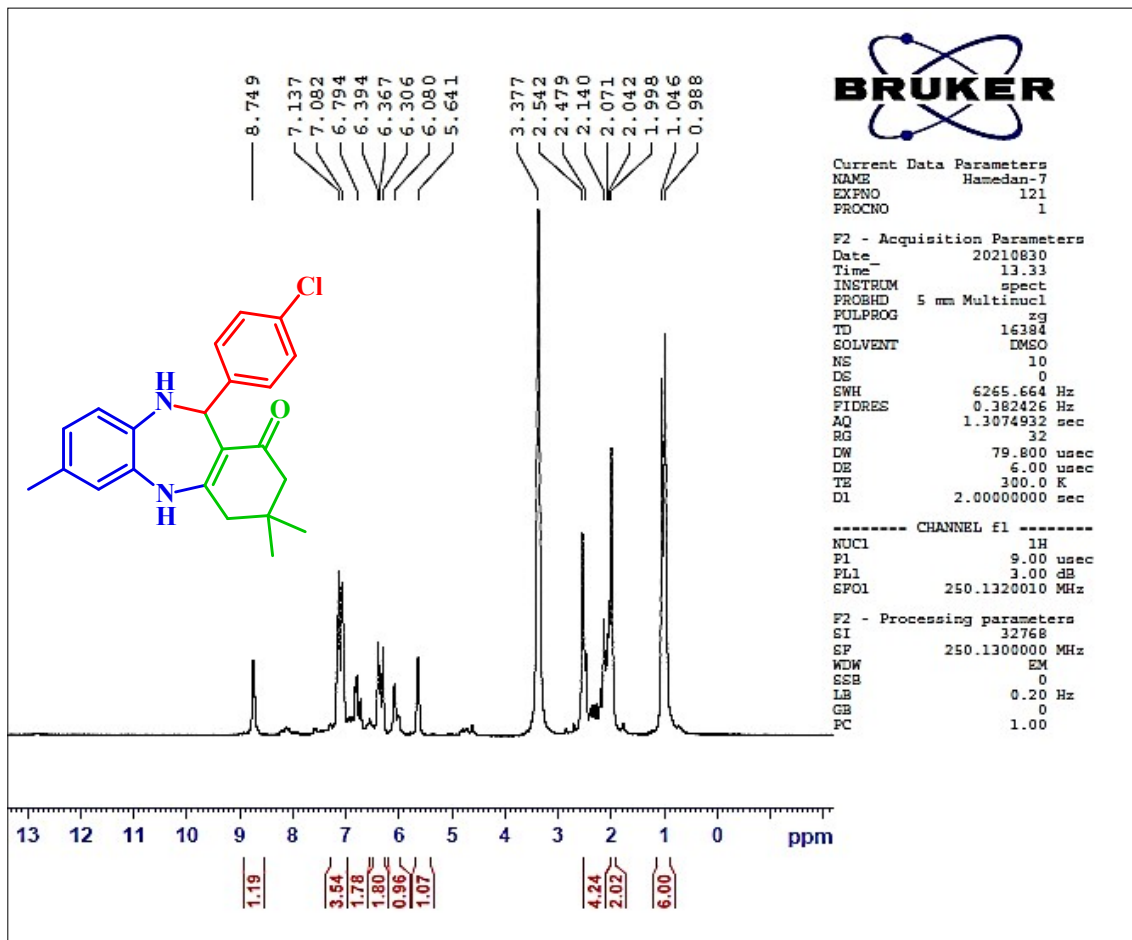

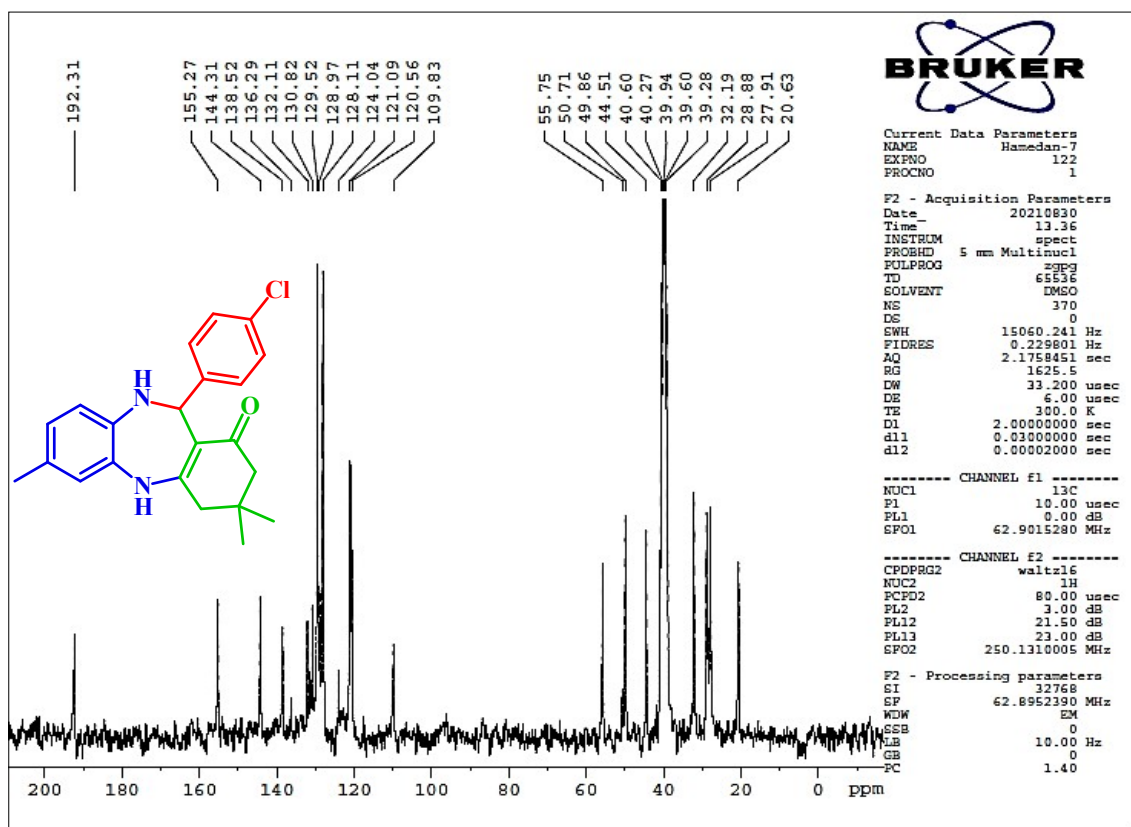

$^1\text{H}$  NMR (250 MHz, DMSO)  $\delta$  0.99 (s, 3H,  $\text{CH}_3$ ), 1.05 (s, 3H,  $\text{CH}_3$ ), 2.04 (s, 3H,  $\text{CH}_3$ ), 2.18 (s, 2H,  $-\text{CH}_2$ ), 2.52 (s, 2H,  $-\text{CH}_2-\text{C}=\text{O}$ ), 5.65 (s, 1H, C-H), 6.10-6.74 (m, 3H Ar), 6.82 (s, NH), 7.01-7.30 (m, 4H Ar), 8.77 (s, NH).  $^{13}\text{C}$  NMR (63 MHz, DMSO)  $\delta$  20.7, 28.4, 32.2, 44.5, 49.9, 55.8, 109.8, 119.4, 120.8, 124.1, 129.0, 130.0, 131.0, 132.1, 136.3, 138.5, 144.8, 155.3, 192.3.

Analyst  
Date

Mina Khorshidi  
Tuesday, May 30, 2023 10:45 AM

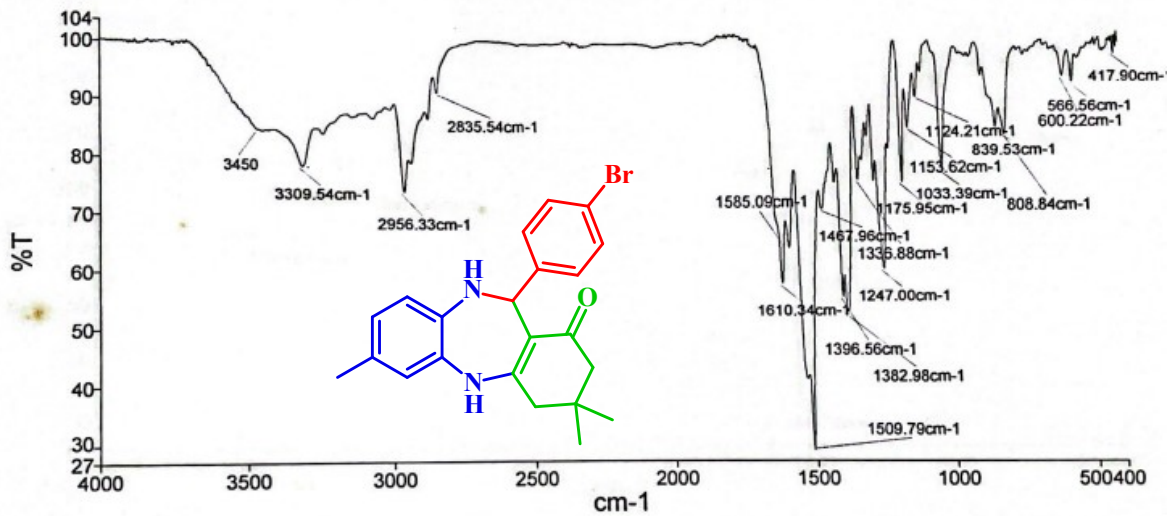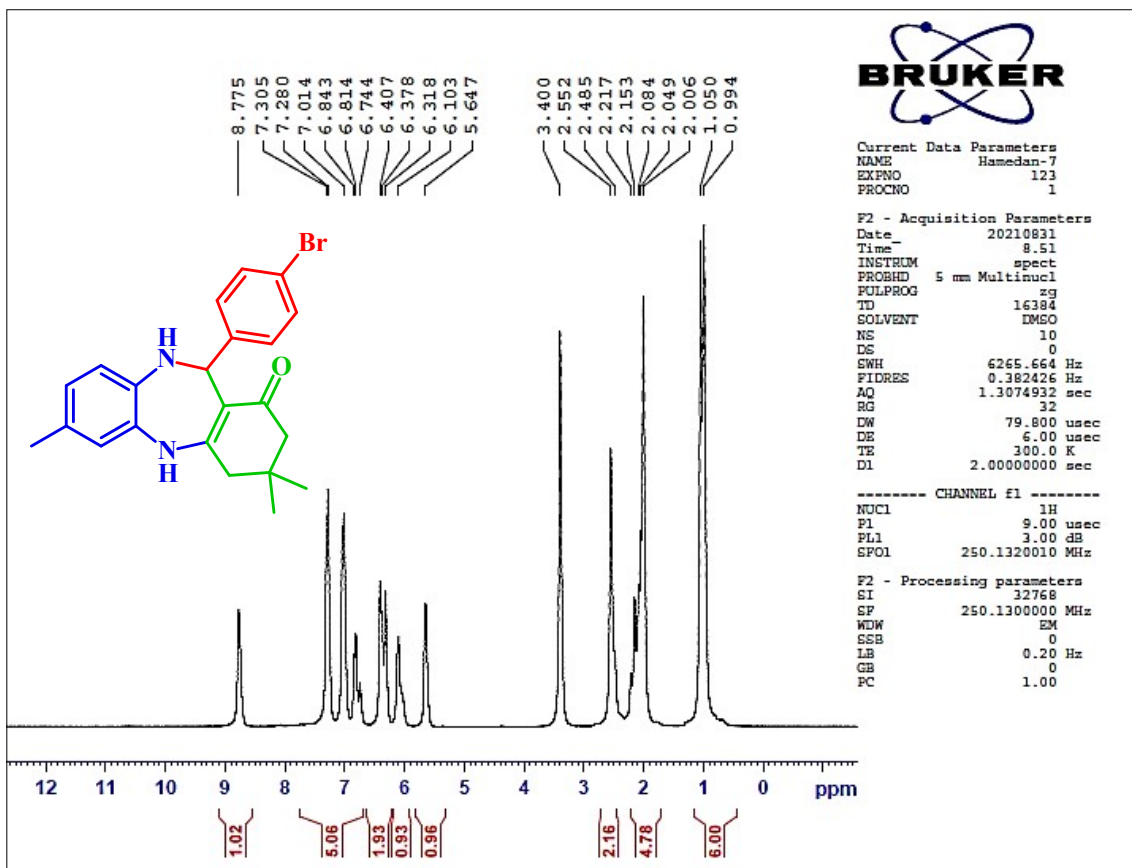



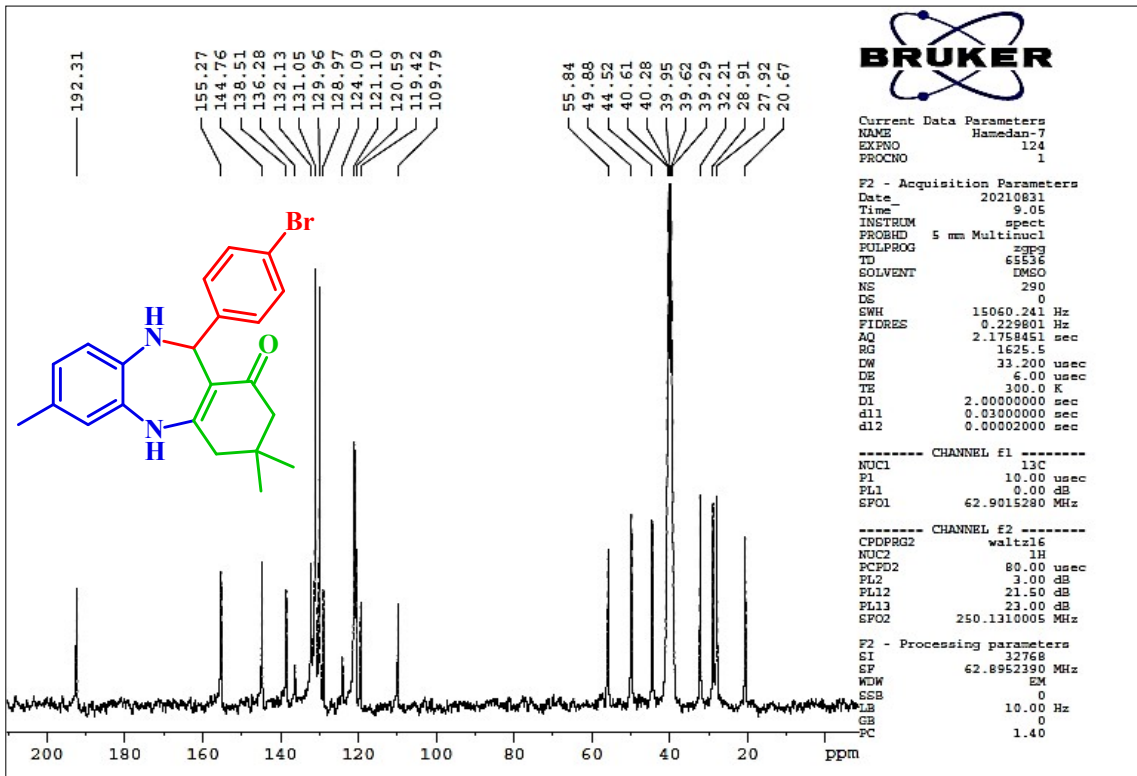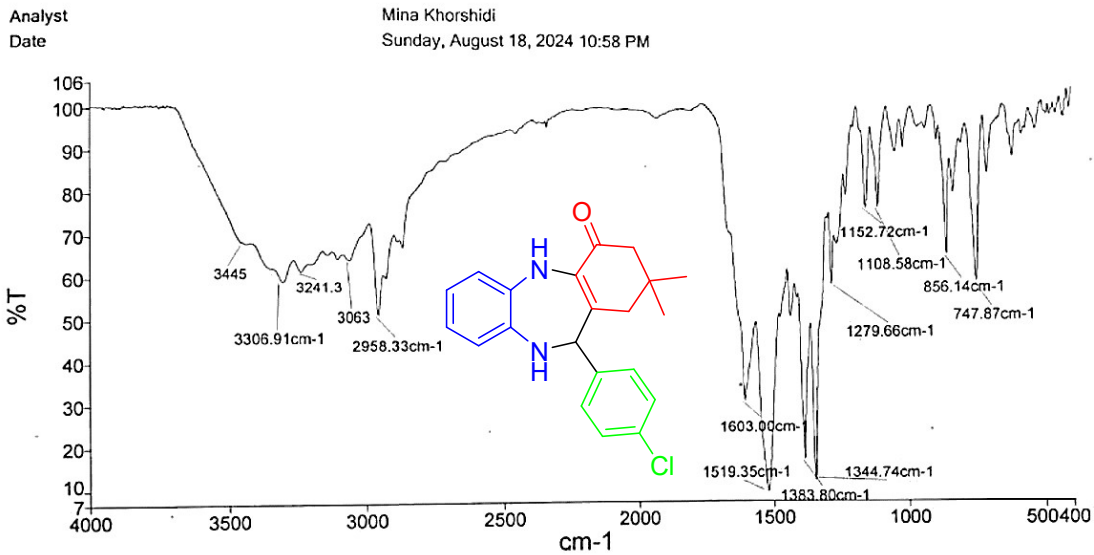



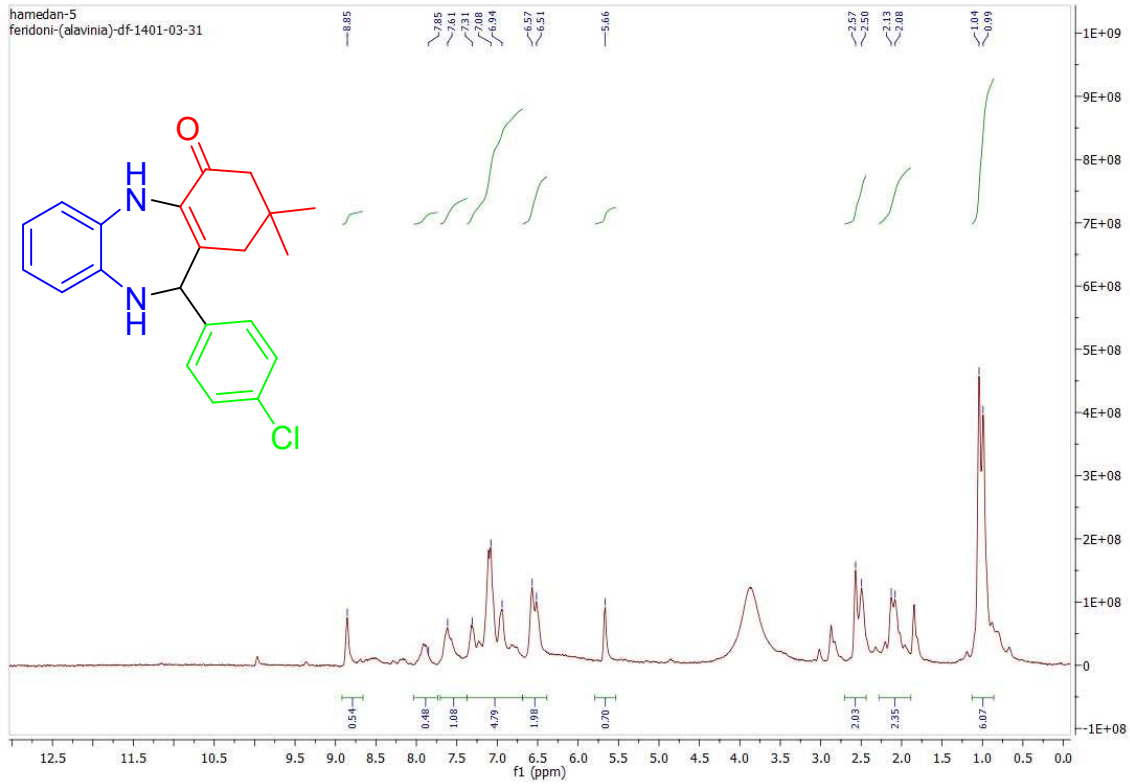

feridono-df-1401-3-31

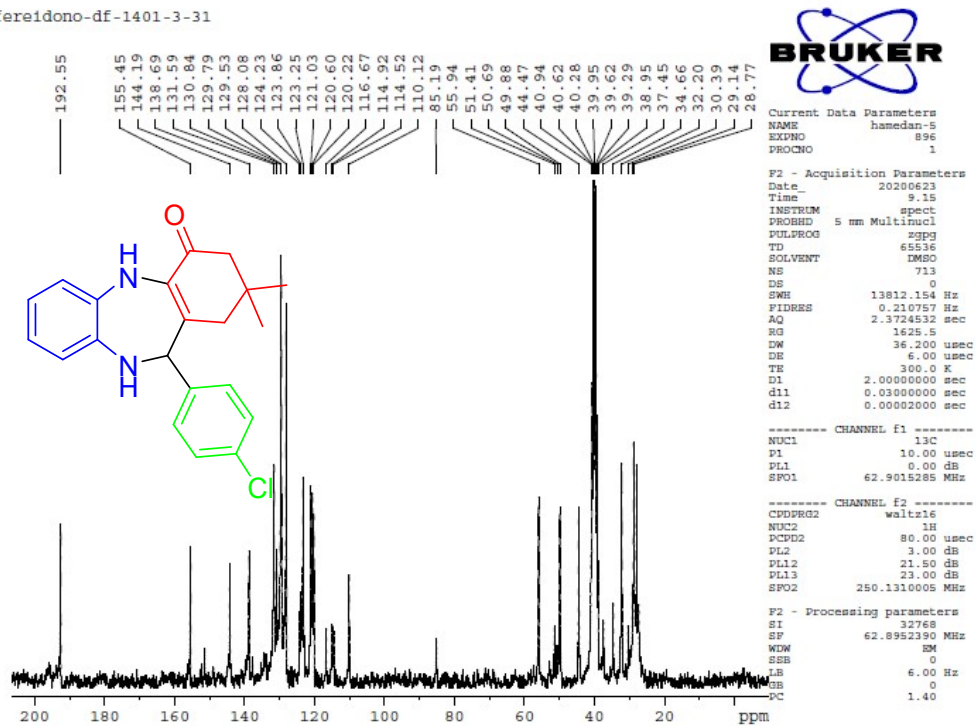

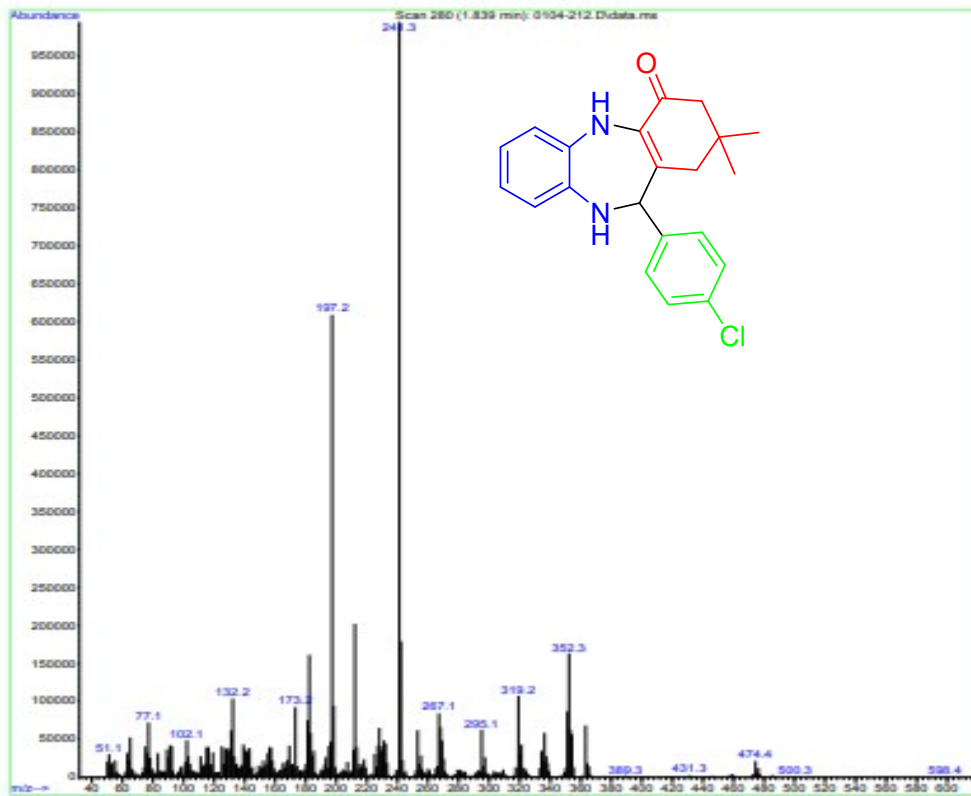

$^1\text{H}$  NMR (250 MHz, DMSO)  $\delta$  0/98 (s, 3H,  $\text{CH}_3$ ), 1.05 (s, 3H,  $\text{CH}_3$ ), 1.98 (s, 3H,  $-\text{CH}_3$ ), 2.09 (s, 2H,  $-\text{CH}_2$ ), 2.60 (s, 2H,  $-\text{CH}_2-\text{C}=\text{O}$ ), 5.50 (s, 1H, C-H), 5.90-6.46 (m, 4H Ar), 6.72-7.07 (m, 3H Ar), 7.49 (s, NH), 8.94 (s, NH).  $^{13}\text{C}$  NMR (63 MHz, DMSO)  $\delta$  20.6, 28.3, 32.3, 44.5, 49.8, 54.3, 108.9, 120.6, 121.3, 121.8, 126.8, 129.1, 129.6, 130.1, 132.0, 132.5, 134.6, 137.5, 140.8, 155.9, 192.2.

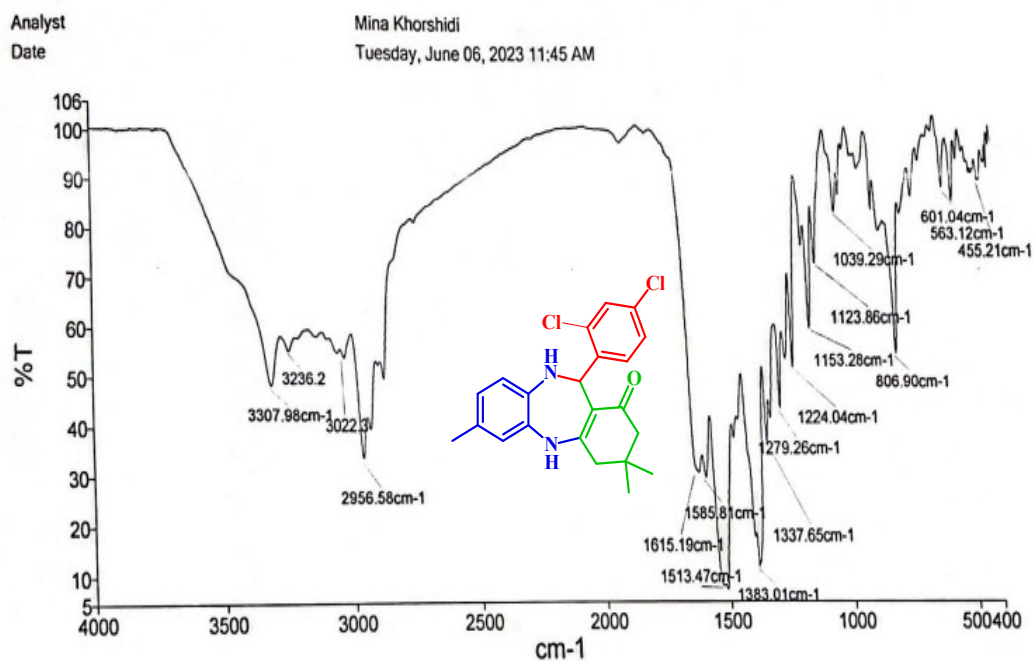

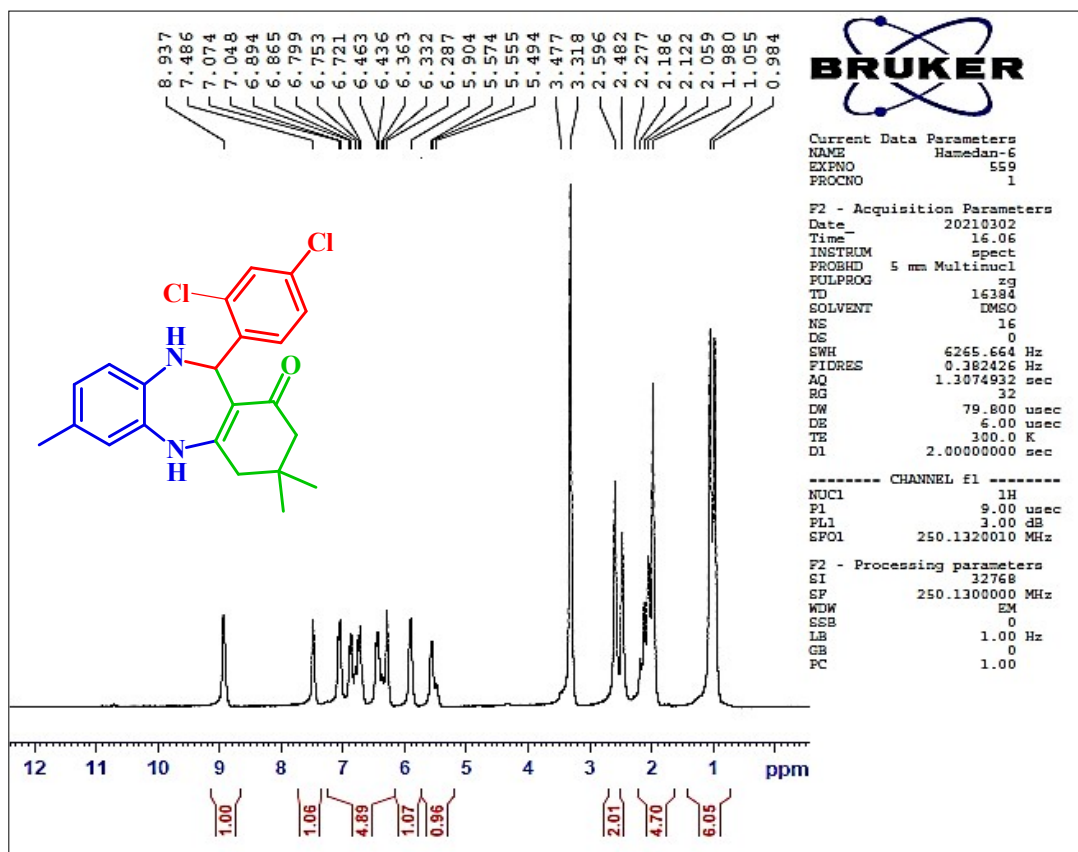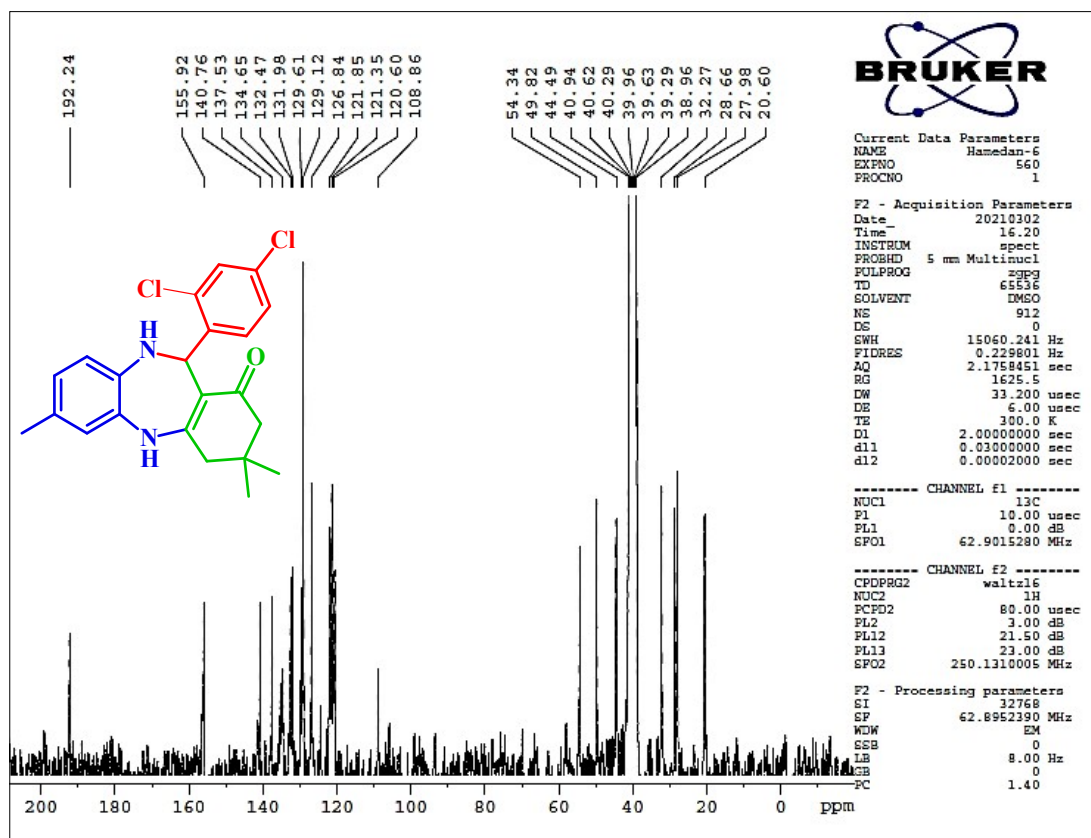

$^1\text{H}$  NMR (250 MHz, DMSO)  $\delta$  1.00 (s, 3H,  $\text{CH}_3$ ), 1.05 (s, 3H,  $\text{CH}_3$ ), 1.98 (s, 3H,  $-\text{CH}_3$ ), 2.21 (q,  $J = 15.5$  Hz, 2H,  $-\text{CH}_2$ ), 2.59 (s, 2H,  $-\text{CH}_2-\text{C}=\text{O}$ ), 5.77 (s, 1H, C-H), 6.21-6.42 (m, 3H Ar), 6.86 (s, NH), 7.32 (d,  $J = 8.2$  Hz, 2H), 7.99 (d,  $J = 8.2$  Hz, 2H), 8.87 (s, NH).  $^{13}\text{C}$  NMR (63 MHz, DMSO)  $\delta$  20.6, 28.3, 32.2, 44.5, 49.8, 56.4, 98.2, 109.2, 120.9, 123.9, 128.8, 131.3, 132.4, 135.8, 138.1, 146.1, 153.4, 155.4, 192.5.

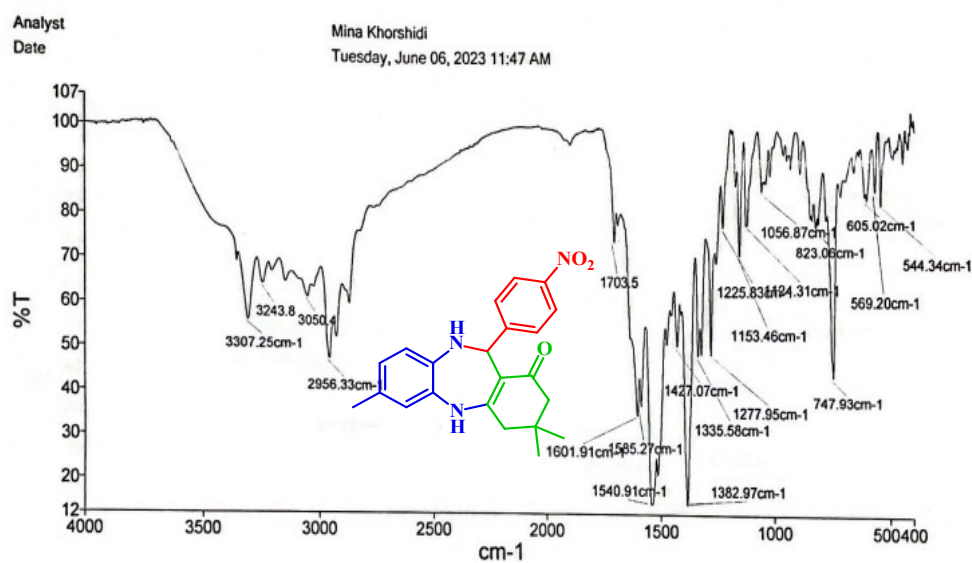

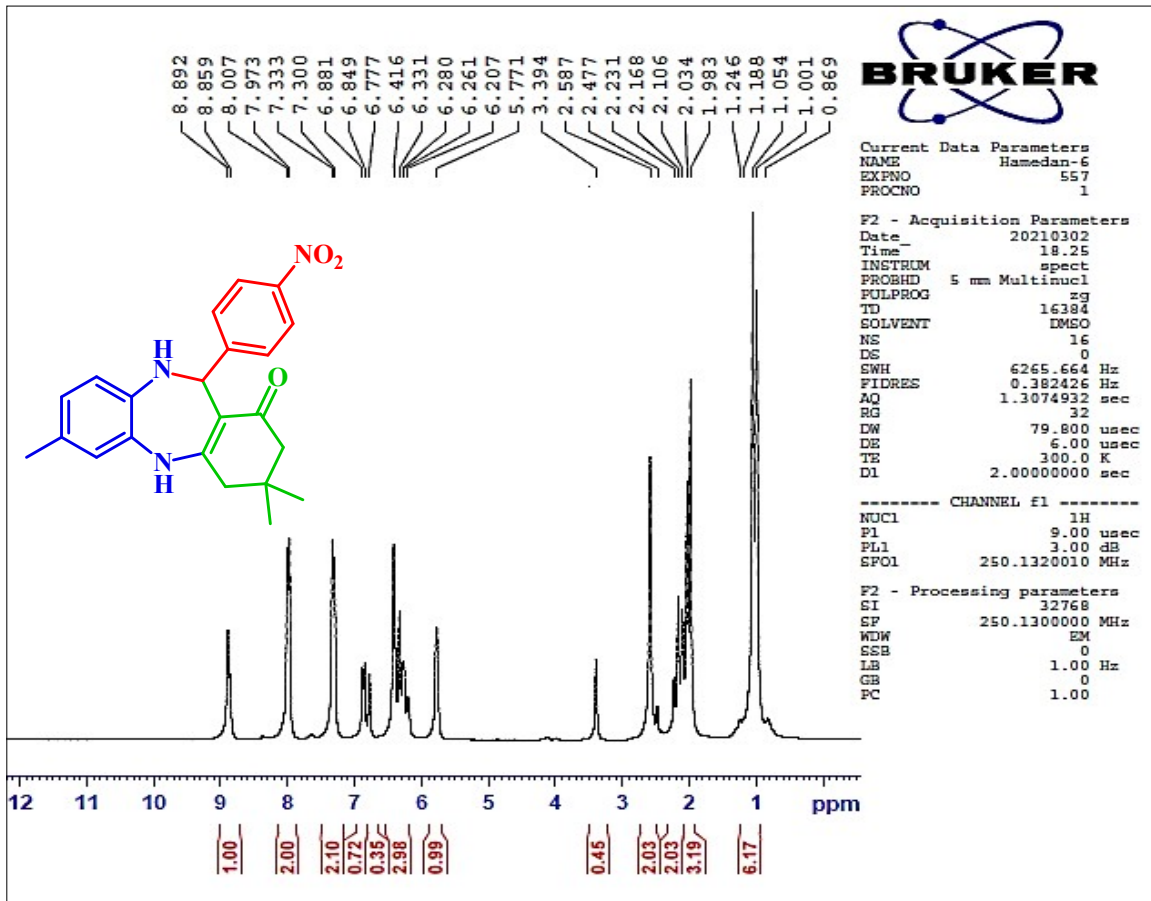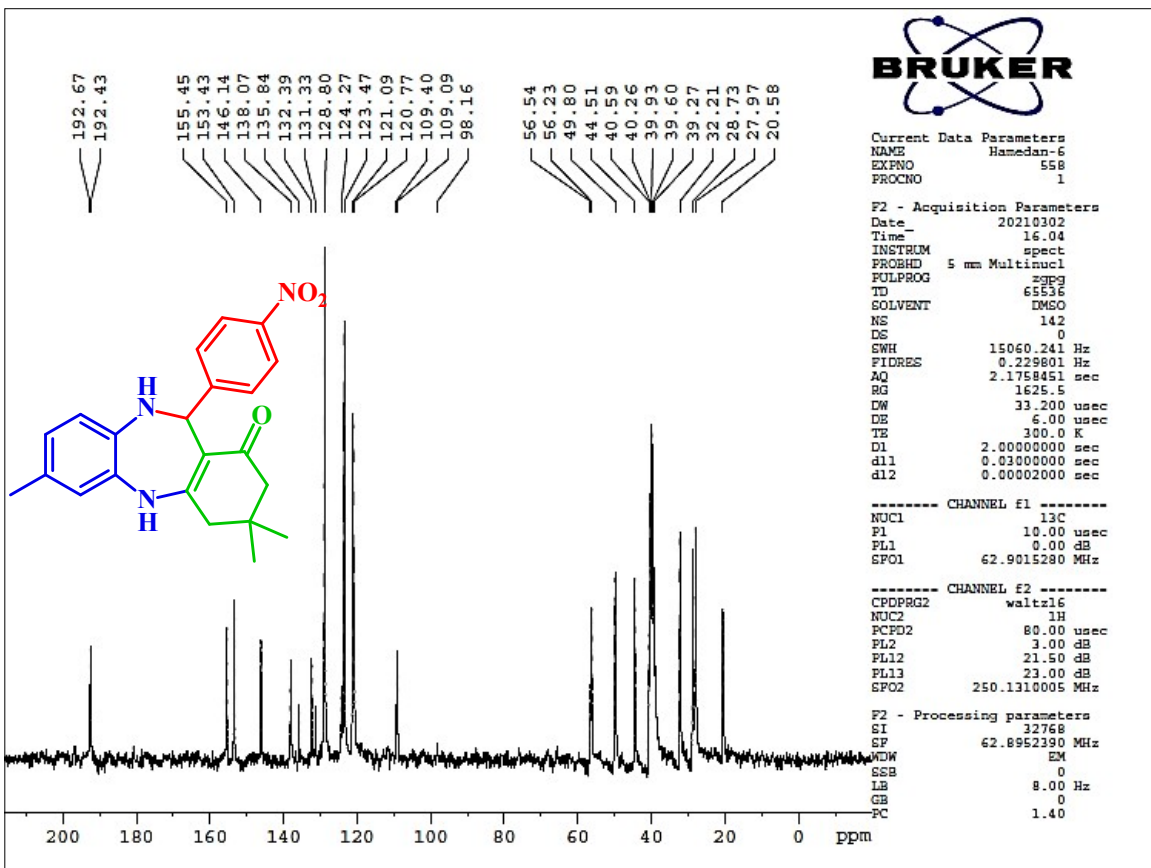

Analyst  
Date

Mina Khorshidi  
Sunday, August 18, 2024 10:52 PM

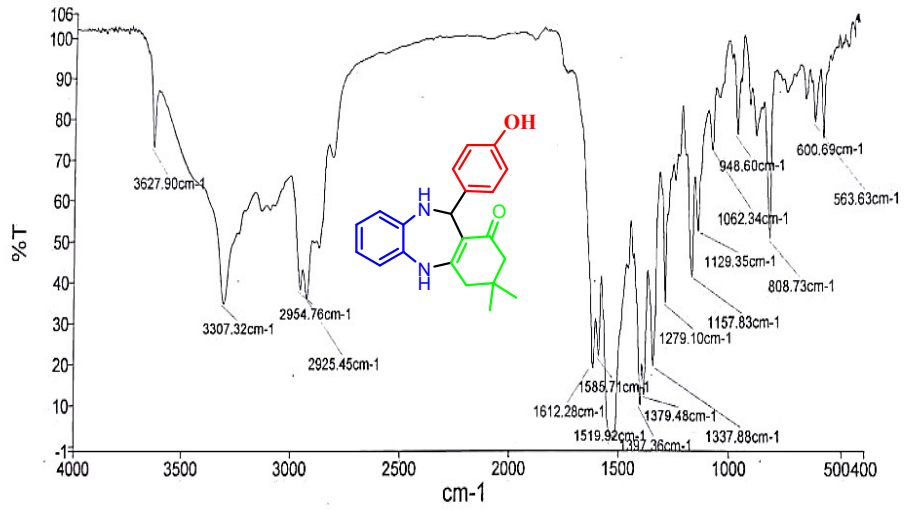

Supplement: d4na00907j1.pdf [file d4na00907j1.pdf]
